# Supplementary material for: Simple, selective detection and efficient removal of toxic lead and silver metal ions using Acid Red 94
Source: Royal Society of Chemistry journal article supplement (doi:10.1039/c9ra00464e), 2019-01-01
Supplement: c9ra00464e1.pdf [file c9ra00464e1.pdf]

## Supporting Information's

### **Simple, selective detection and efficient removing of the toxic lead and silver metal ions by using Acid Red 94**

**Ghada Kamel,<sup>a,b</sup> Marwa N. El-Nahas,<sup>a</sup> Mohamed E. El-Khouly,<sup>b,c,\*</sup> Tarek A. Fayed,<sup>a</sup>  
Maged El-Kemary<sup>d</sup>**

*<sup>a</sup> Department of Chemistry, Faculty of Science, Tanta University, 31527, Tanta, Egypt*

*<sup>b</sup> Department of Chemistry, Faculty of Science, Kafrelsheikh University, Kafr El-Sheikh 33516,  
Egypt*

*<sup>c</sup>Institute of Basic and Applied Sciences, Egypt-Japan University of Science and Technology,  
Alexandria, Egypt*

*<sup>d</sup> Institute of Nanoscience and Nanotechnology, Kafrelsheikh University, Kafr El-Sheikh 33516,  
Egypt*

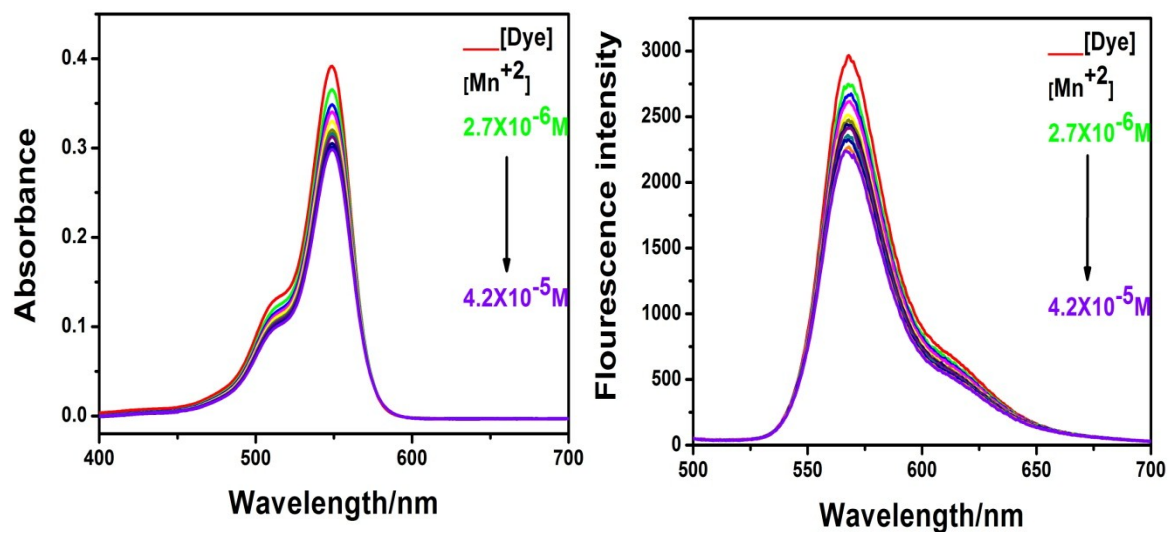

Fig. S1. Steady state absorption and fluorescence spectra of AR94 in the presence of Mn<sup>2+</sup> in water.

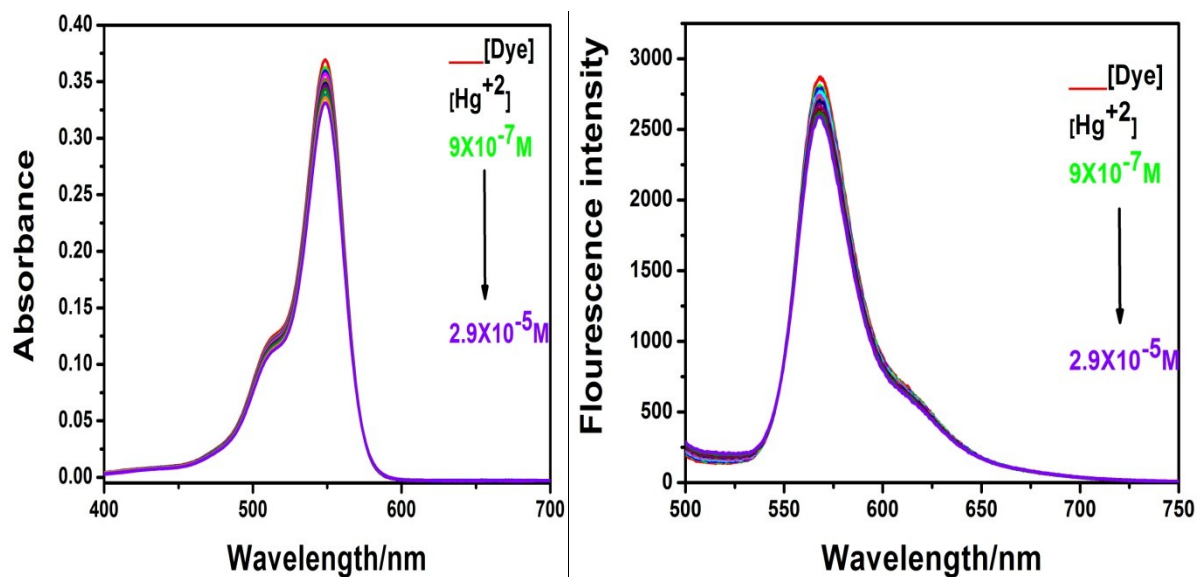

Fig. S2. Steady state absorption and fluorescence spectra of AR94 in the presence of Hg<sup>2+</sup> in water.

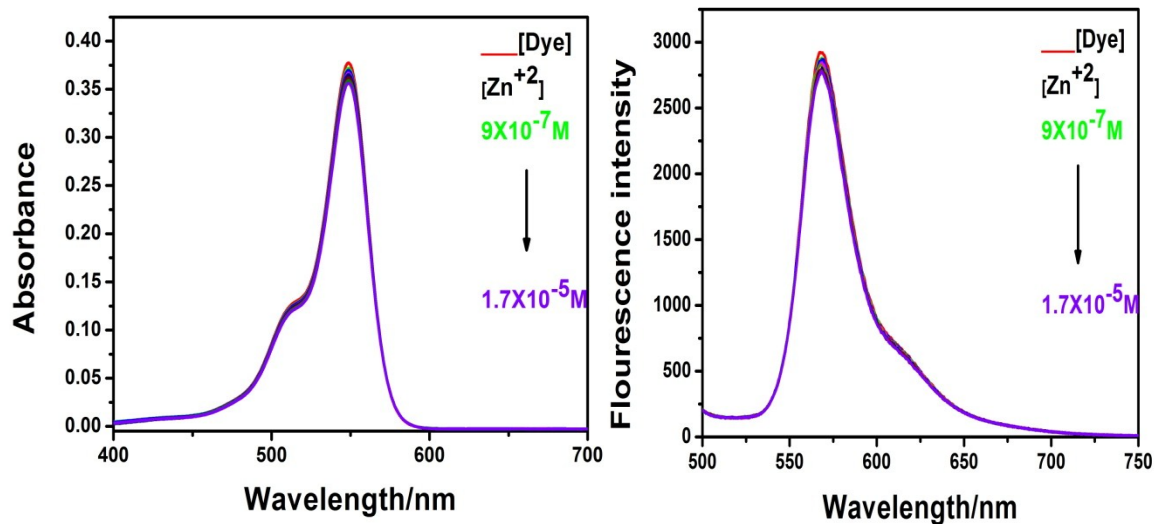

Fig. S3. Steady state absorption and fluorescence spectra of AR94 in the presence of Zn<sup>2+</sup> in water.

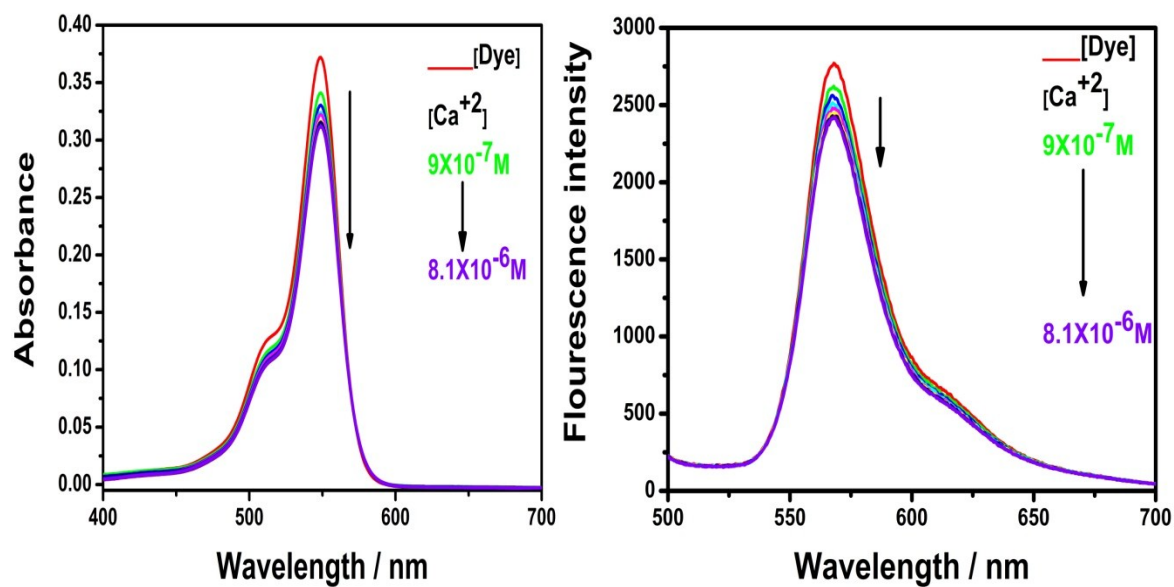

Fig. S4. Steady state absorption and fluorescence spectra of AR94 in the presence of Cd<sup>2+</sup> in water.
